# Supplementary material for: Last-millennium volcanic forcing and climate response using SO 2 emissions
Source: Copernicus journal article supplement (doi:10.5194/cp-21-161-2025), 2025-01-27
Supplement: Supplementary file 1 [file cp-21-161-2025-supplement.pdf]

Supplement of *Clim. Past*, 21, 161–184, 2025  
<https://doi.org/10.5194/cp-21-161-2025-supplement>  
© Author(s) 2025. CC BY 4.0 License.

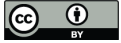

*Supplement of*

## **Last-millennium volcanic forcing and climate response using SO<sub>2</sub> emissions**

**Lauren R. Marshall et al.**

*Correspondence to:* Lauren R. Marshall ([lr27@st-andrews.ac.uk](mailto:lr27@st-andrews.ac.uk)) and Anja Schmidt ([anja.schmidt@dlr.de](mailto:anja.schmidt@dlr.de))

The copyright of individual parts of the supplement might differ from the article licence.

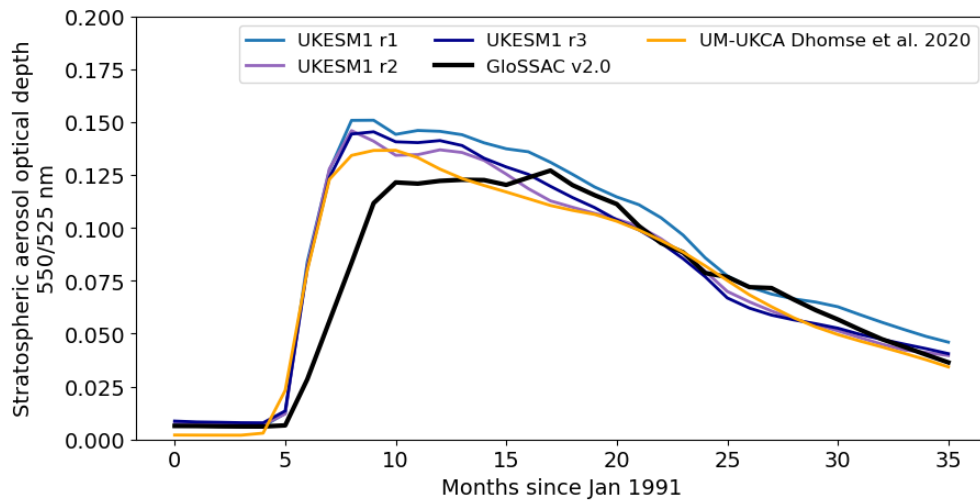

**Figure S1.** Global mean stratospheric aerosol optical depth following the 1991 Mt. Pinatubo eruption from our SO<sub>2</sub>-driven UKESM1 simulations vs. UM-UKCA v8.4 (Dhomse et al., 2020) and from observations (GloSSAC) (Thomason et al., 2018). In these simulations 10 Tg of SO<sub>2</sub> is emitted between 0 and 15°N at an altitude of 22-25 km in UKESM1 and 21-23 km in UM-UKCA. Simulated SAOD is at 550 nm; GloSSAC is at 525 nm.

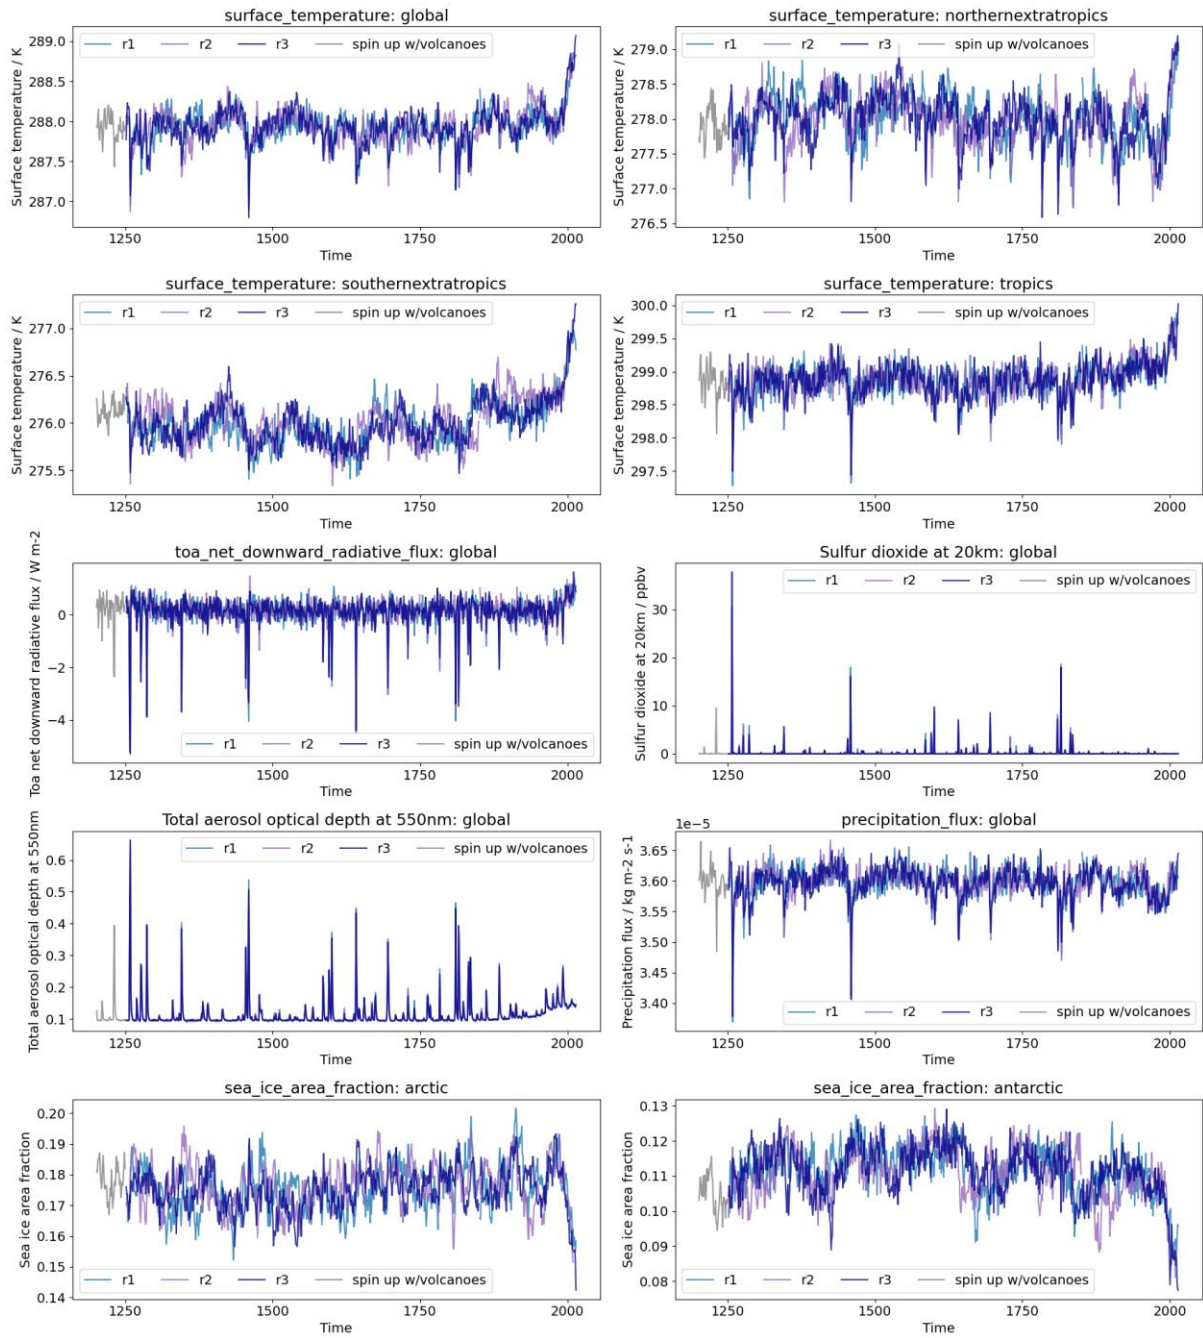

**Figure S2.** Annual mean atmospheric climate metrics. Due to restarts of the simulations, annual means shown here are missing for 1250, 1750 and 1850, as well as 1794, 1833 and 2010-2014 for r2, and 1429 and 1468 for r3.

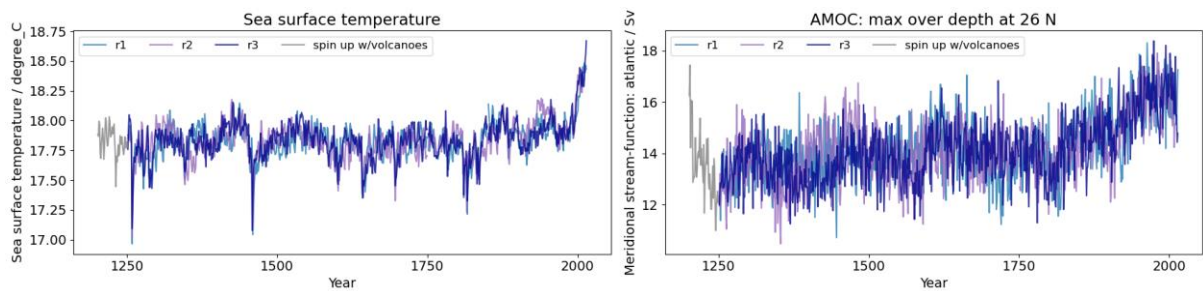

**Figure S3.** Global annual mean sea surface temperature and AMOC.

## S1. SO<sub>2</sub> emissions implementation in MRI-ESM2

SO<sub>2</sub> emissions, eruption location and year are taken from eVolv2k (Toohey and Sigl, 2017), with unknown eruptions simulated on January 1<sup>st</sup> and at 0°E. The emission altitude is fixed at around 24 km. The model uses the MASINGAR mk-2r4c aerosol scheme; Model of Aerosol Species in the Global Atmosphere mark-2 revision 4-climate (Yukimoto et al., 2019).

## S2. Extended model information for UKESM1

A summary of the forcing data and how it was implemented in our last millennium simulations is included in Table S1. The volcanic emissions dataset is included in Table S2, also shown in Figure S4. Three monthly mean files failed to archive: for surface temperature, July 1696 from ensemble member 2 and Feb 1285 from ensemble member 3, and for SAOD, March 1284 from ensemble member 3. These datapoints are consequently ignored in any analysis. The closest eruptions are in 1276 (therefore not affected by the 1284 and 1285 missing files) and 1693 and 1695 but these eruptions are not a focus of our study and do not affect our results.

**Table S1.** Forcing data and its implementation in UKESM1.

| <b>Forcing</b>                           | <b>Details</b>                                                                                                                                                                                                                                                                                                                                                                                                                                                                                                                                                                          |
|------------------------------------------|-----------------------------------------------------------------------------------------------------------------------------------------------------------------------------------------------------------------------------------------------------------------------------------------------------------------------------------------------------------------------------------------------------------------------------------------------------------------------------------------------------------------------------------------------------------------------------------------|
| <b>GHG concentrations</b>                | GHG mmr specified for use in radiation scheme. GHG vmr used by the chemistry scheme (Meinshausen et al., 2017).                                                                                                                                                                                                                                                                                                                                                                                                                                                                         |
| <b>Solar</b>                             | PMIP4 forcing data (14C SATIRE) processed by SOCRATES radiation code as described in Jungclauss et al. (2017).                                                                                                                                                                                                                                                                                                                                                                                                                                                                          |
| <b>Volcanic forcing interactive</b>      | SO <sub>2</sub> emissions provided by Toohey and Sigl (2017) with two updates:<br><ol style="list-style-type: none"><li>1. For unidentified eruptions, the season was randomly assigned to either January, April, July or October. The eruptions included are listed in Table S2.</li><li>2. For Laki, we used daily emissions (Schmidt et al., 2010).</li></ol><br>In UKESM the grid boxes meet at the equator and therefore all tropical unidentified eruptions had the SO <sub>2</sub> emission injected into the grid box at 0-1.25° N. Emissions were spread between 18 and 20 km. |
| <b>Aerosol &amp; chemistry emissions</b> | Transient emissions from 1750 onwards following Hoesly et al. (2018), constant 1750 emissions from 1250-1749.                                                                                                                                                                                                                                                                                                                                                                                                                                                                           |
| <b>Land-use change (crop/pasture)</b>    | Crops and pasture fractions set following the CMIP6 forcing (Hurt et al., 2020). Other vegetation fractions determined by a dynamical vegetation scheme (TRIFFID).                                                                                                                                                                                                                                                                                                                                                                                                                      |
| <b>Nitrogen deposition</b>               | 1850 climatology used.                                                                                                                                                                                                                                                                                                                                                                                                                                                                                                                                                                  |
| <b>Ozone</b>                             | Interactive chemistry. No change to ozone from changes to incoming UV.                                                                                                                                                                                                                                                                                                                                                                                                                                                                                                                  |

**Table S2.** Volcanic emissions dataset. Eruptions that are simulated in different seasons to the EVA(2k) dataset are highlighted in grey.

| Event number | Day | Month | Year | SO <sub>2</sub> mass (Tg SO <sub>2</sub> ) | Latitude (°N) | Longitude (°E) | Volcano name        |
|--------------|-----|-------|------|--------------------------------------------|---------------|----------------|---------------------|
| 1            | 1   | 1     | 1890 | 0.8                                        | -45           | 140            | unidentified        |
| 2            | 10  | 6     | 1886 | 1.48                                       | -38           | 176.5          | Okataina            |
| 3            | 27  | 8     | 1883 | 18.68                                      | -6            | 105.4          | Krakatau            |
| 4            | 1   | 4     | 1875 | 1.34                                       | 65            | -16.7          | Askja               |
| 5            | 8   | 1     | 1873 | 2.34                                       | 64.4          | -17.3          | Grimsvotn           |
| 6            | 1   | 12    | 1861 | 9.06                                       | 0.3           | 127.4          | Makian              |
| 7            | 25  | 9     | 1856 | 2.52                                       | 42.1          | 140.7          | Hokkaido_Komagatake |
| 8            | 22  | 4     | 1853 | 2.72                                       | 42.5          | 140.8          | Toya                |
| 9            | 1   | 4     | 1846 | 1.94                                       | 45            | 140            | unidentified        |
| 10           | 20  | 1     | 1835 | 18.96                                      | 13            | -87.6          | Cosigueina          |
| 11           | 1   | 7     | 1831 | 25.96                                      | 19.5          | 121.9          | Babuyan_Claro*      |
| 12           | 8   | 10    | 1822 | 4.04                                       | -7.3          | 108.1          | Galunggung          |
| 13           | 1   | 1     | 1821 | 1.1                                        | -45           | 140            | unidentified        |
| 14           | 10  | 4     | 1815 | 56.16                                      | -8            | 118            | Tambora             |
| 15           | 1   | 10    | 1809 | 38.52                                      | 0             | 140            | unidentified        |
| 16           | 1   | 7     | 1797 | 1.48                                       | 45            | 140            | unidentified        |
| 17           | 1   | 10    | 1796 | 1.38                                       | 45            | 140            | unidentified        |
| 18           | 1   | 4     | 1786 | 1.66                                       | 45            | 140            | unidentified        |
| 19           | 15  | 6     | 1783 | 41.62                                      | 64.4          | -17.3          | Laki**              |
| 20           | 1   | 10    | 1770 | 1.4                                        | 45            | 140            | unidentified        |
| 21           | 5   | 4     | 1766 | 5.04                                       | 64            | -19.7          | Hekla               |
| 22           | 1   | 4     | 1762 | 9.64                                       | 0             | 140            | unidentified        |
| 23           | 17  | 10    | 1755 | 2.36                                       | 63.6          | -19.1          | Katla               |
| 24           | 19  | 8     | 1739 | 6.88                                       | 42.7          | 141.4          | Shikotsu            |
| 25           | 1   | 1     | 1729 | 9.64                                       | 45            | 140            | unidentified        |
| 26           | 11  | 5     | 1721 | 1.62                                       | 63.6          | -19.1          | Katla               |
| 27           | 1   | 7     | 1720 | 1.44                                       | 45            | 140            | unidentified        |
| 28           | 16  | 12    | 1707 | 2.16                                       | 35.4          | 138.7          | Fujisan             |
| 29           | 1   | 4     | 1695 | 31.48                                      | 0             | 140            | unidentified        |
| 30           | 1   | 10    | 1693 | 5.64                                       | 0             | 140            | unidentified        |
| 31           | 20  | 5     | 1673 | 9.34                                       | 1.4           | 127.5          | Gamkonora           |
| 32           | 23  | 9     | 1667 | 6.96                                       | 42.7          | 141.4          | Shikotsu            |
| 33           | 1   | 7     | 1662 | 1.52                                       | -45           | 140            | unidentified        |
| 34           | 1   | 7     | 1654 | 7.44                                       | 0             | 140            | unidentified        |
| 35           | 1   | 4     | 1646 | 4.84                                       | 45            | 140            | unidentified        |
| 36           | 26  | 12    | 1640 | 37.36                                      | 6.1           | 124.9          | Parker              |
| 37           | 1   | 7     | 1637 | 2.6                                        | 45            | 140            | unidentified        |
| 38           | 1   | 1     | 1621 | 3.26                                       | -45           | 140            | unidentified        |
| 39           | 17  | 2     | 1600 | 37.9                                       | -16.6         | -70.85         | Huaynaputina        |
| 40           | 1   | 3     | 1595 | 17.74                                      | 4.9           | -75.3          | Nevado_del_Ruiz     |
| 41           | 1   | 10    | 1590 | 0.98                                       | -45           | 140            | unidentified        |
| 42           | 10  | 4     | 1585 | 17.02                                      | 19.5          | -103.62        | Colima              |
| 43           | 1   | 1     | 1576 | 0.8                                        | -45           | 140            | unidentified        |
| 44           | 1   | 7     | 1567 | 5.02                                       | 45            | 140            | unidentified        |
| 45           | 1   | 7     | 1554 | 4.82                                       | 0             | 140            | unidentified        |
| 46           | 1   | 4     | 1541 | 1.9                                        | -45           | 140            | unidentified        |
| 47           | 1   | 1     | 1537 | 1.7                                        | 45            | 140            | unidentified        |
| 48           | 1   | 7     | 1528 | 2.16                                       | 45            | 140            | unidentified        |
| 49           | 1   | 10    | 1512 | 0.42                                       | -45           | 140            | unidentified        |
| 50           | 25  | 7     | 1510 | 4.6                                        | 64            | -19.7          | Hekla               |
| 51           | 1   | 1     | 1505 | 1.74                                       | -45           | 140            | unidentified        |
| 52           | 1   | 4     | 1502 | 2                                          | 45            | 140            | unidentified        |
| 53           | 1   | 7     | 1480 | 3.32                                       | 45            | 140            | unidentified        |

|     |   |    |      |        |      |        |              |
|-----|---|----|------|--------|------|--------|--------------|
| 54  | 1 | 10 | 1478 | 2.36   | -45  | 140    | unidentified |
| 55  | 1 | 2  | 1477 | 10.24  | 64.6 | -17.51 | Bardarbunga  |
| 56  | 1 | 1  | 1470 | 2.78   | 45   | 140    | unidentified |
| 57  | 1 | 7  | 1463 | 1.22   | 45   | 140    | unidentified |
| 58  | 1 | 7  | 1458 | 65.96  | 0    | 140    | unidentified |
| 59  | 1 | 10 | 1453 | 19.94  | 0    | 140    | unidentified |
| 60  | 1 | 10 | 1448 | 1.48   | -45  | 140    | unidentified |
| 61  | 1 | 4  | 1441 | 1.6    | 45   | 140    | unidentified |
| 62  | 1 | 4  | 1414 | 3.8    | 0    | 140    | unidentified |
| 63  | 1 | 4  | 1389 | 6.52   | 0    | 140    | unidentified |
| 64  | 1 | 1  | 1381 | 4.92   | 0    | 140    | unidentified |
| 65  | 1 | 7  | 1378 | 1.86   | -45  | 140    | unidentified |
| 66  | 1 | 1  | 1345 | 30.22  | 0    | 140    | unidentified |
| 67  | 1 | 1  | 1341 | 2.34   | 45   | 140    | unidentified |
| 68  | 1 | 7  | 1336 | 1.34   | -45  | 140    | unidentified |
| 69  | 1 | 10 | 1329 | 7.38   | 45   | 140    | unidentified |
| 70  | 1 | 10 | 1306 | 1.44   | -45  | 140    | unidentified |
| 71  | 1 | 1  | 1286 | 30.12  | 0    | 140    | unidentified |
| 72  | 1 | 4  | 1276 | 23.06  | 0    | 140    | unidentified |
| 73  | 1 | 1  | 1269 | 6.34   | -45  | 140    | unidentified |
| 74  | 1 | 1  | 1260 | 2.1    | 45   | 140    | unidentified |
| 75  | 1 | 7  | 1257 | 118.84 | -8.4 | 116.47 | Samalas      |
| 76  | 1 | 4  | 1236 | 0.76   | -45  | 140    | unidentified |
| 77  | 1 | 7  | 1230 | 47.56  | 0    | 140    | unidentified |
| 78  | 1 | 7  | 1222 | 1.74   | 45   | 140    | unidentified |
| 79  | 1 | 1  | 1210 | 6.58   | 45   | 140    | unidentified |
| 80  | 1 | 10 | 1200 | 6.58   | 45   | 140    | unidentified |
| 81  | 1 | 4  | 1191 | 17.06  | 0    | 140    | unidentified |
| 82  | 1 | 4  | 1182 | 20.1   | 45   | 140    | unidentified |
| 83  | 1 | 7  | 1180 | 0.58   | -45  | 140    | unidentified |
| 84  | 1 | 1  | 1171 | 36.1   | 0    | 140    | unidentified |
| 85  | 1 | 7  | 1137 | 2.12   | 45   | 140    | unidentified |
| 86  | 1 | 10 | 1127 | 7.36   | 0    | 140    | unidentified |
| 87  | 1 | 4  | 1118 | 0.6    | -45  | 140    | unidentified |
| 88  | 1 | 10 | 1115 | 1.56   | 45   | 140    | unidentified |
| 89  | 1 | 10 | 1108 | 38.32  | 0    | 140    | unidentified |
| 90  | 1 | 4  | 1092 | 0.46   | -45  | 140    | unidentified |
| 91  | 1 | 1  | 1067 | 1.34   | 45   | 140    | unidentified |
| 92  | 1 | 4  | 1064 | 1.88   | 45   | 140    | unidentified |
| 93  | 1 | 1  | 1057 | 1.66   | 45   | 140    | unidentified |
| 94  | 1 | 4  | 1039 | 4.14   | -45  | 140    | unidentified |
| 95  | 1 | 7  | 1028 | 15.56  | 0    | 140    | unidentified |
| 96  | 1 | 7  | 1020 | 3.94   | 45   | 140    | unidentified |
| 97  | 1 | 4  | 1011 | 3.22   | 45   | 140    | unidentified |
| 98  | 1 | 7  | 1003 | 9.96   | 0    | 140    | unidentified |
| 99  | 1 | 1  | 998  | 2.06   | 45   | 140    | unidentified |
| 100 | 1 | 1  | 990  | 0.42   | -45  | 140    | unidentified |
| 101 | 1 | 10 | 982  | 3.08   | 45   | 140    | unidentified |
| 102 | 1 | 4  | 976  | 12.48  | 0    | 140    | unidentified |
| 103 | 1 | 4  | 970  | 2.2    | 45   | 140    | unidentified |
| 104 | 1 | 7  | 960  | 3.04   | -45  | 140    | unidentified |
| 105 | 1 | 7  | 958  | 1.36   | 45   | 140    | unidentified |
| 106 | 1 | 10 | 953  | 1.76   | 45   | 140    | unidentified |
| 107 | 1 | 11 | 946  | 3.44   | 42   | 128.1  | Changbaishan |
| 108 | 1 | 4  | 939  | 32.46  | 63.6 | -19.1  | Eldgja       |
| 109 | 1 | 10 | 929  | 8.12   | 0    | 140    | unidentified |
| 110 | 1 | 4  | 916  | 12.16  | 0    | 140    | unidentified |
| 111 | 1 | 4  | 908  | 1.48   | 45   | 140    | unidentified |

|     |   |    |     |       |      |         |              |
|-----|---|----|-----|-------|------|---------|--------------|
| 112 | 1 | 7  | 904 | 7.7   | 45   | 140     | unidentified |
| 113 | 1 | 7  | 900 | 11.12 | 0    | 140     | unidentified |
| 114 | 1 | 10 | 880 | 2.56  | 45   | 140     | unidentified |
| 115 | 1 | 11 | 879 | 6.1   | 64.6 | -17.51  | Bardarbunga  |
| 116 | 1 | 4  | 876 | 3.84  | 45   | 140     | unidentified |
| 117 | 1 | 1  | 869 | 1.02  | -45  | 140     | unidentified |
| 118 | 1 | 4  | 859 | 7.98  | 0    | 140     | unidentified |
| 119 | 1 | 1  | 853 | 4.96  | 61.4 | -141.75 | Churchill    |
| 120 | 1 | 10 | 853 | 2.44  | -45  | 140     | unidentified |
| 121 | 1 | 4  | 841 | 1.94  | 45   | 140     | unidentified |
| 122 | 1 | 7  | 835 | 1.6   | 45   | 140     | unidentified |
| 123 | 1 | 7  | 827 | 0.5   | -45  | 140     | unidentified |
| 124 | 1 | 10 | 822 | 7.86  | 45   | 140     | unidentified |
| 125 | 1 | 11 | 819 | 2.7   | -45  | 140     | unidentified |
| 126 | 1 | 4  | 817 | 18.68 | 45   | 140     | unidentified |
| 127 | 1 | 1  | 800 | 4.96  | 45   | 140     | unidentified |

\*This eruption may be falsely attributed (Garrison et al., 2018). \*\*Daily emissions used to represent Laki in UKESM1 and CESM2(WACCM6ma)

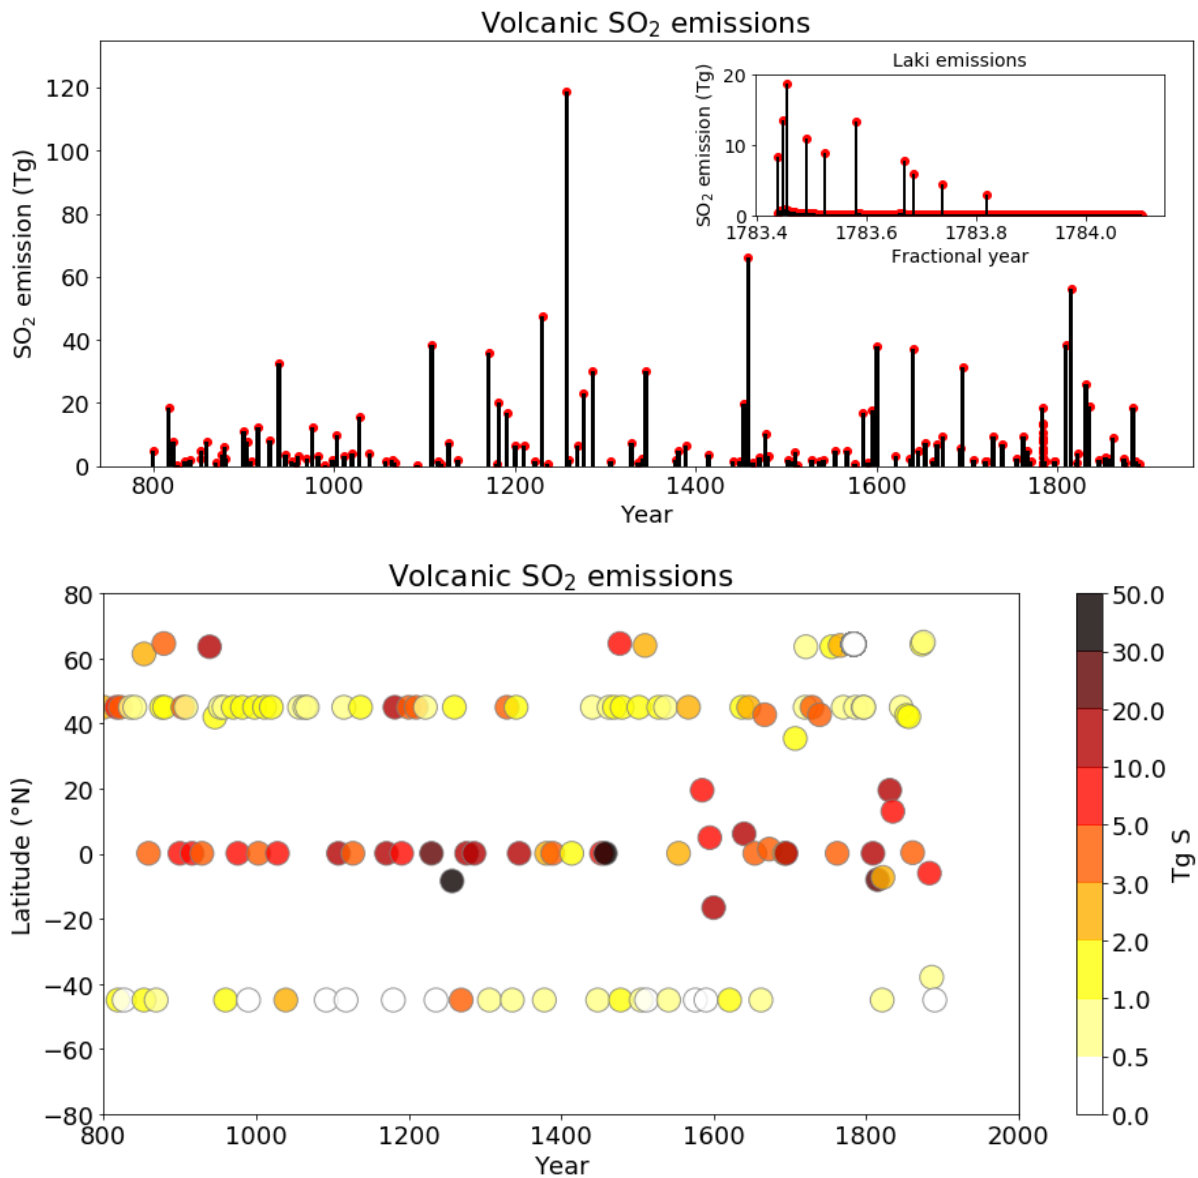

**Figure S4.** Volcanic emissions dataset. Top: total SO<sub>2</sub> emission including high-resolution emissions for Laki. Bottom: Latitude of emission.



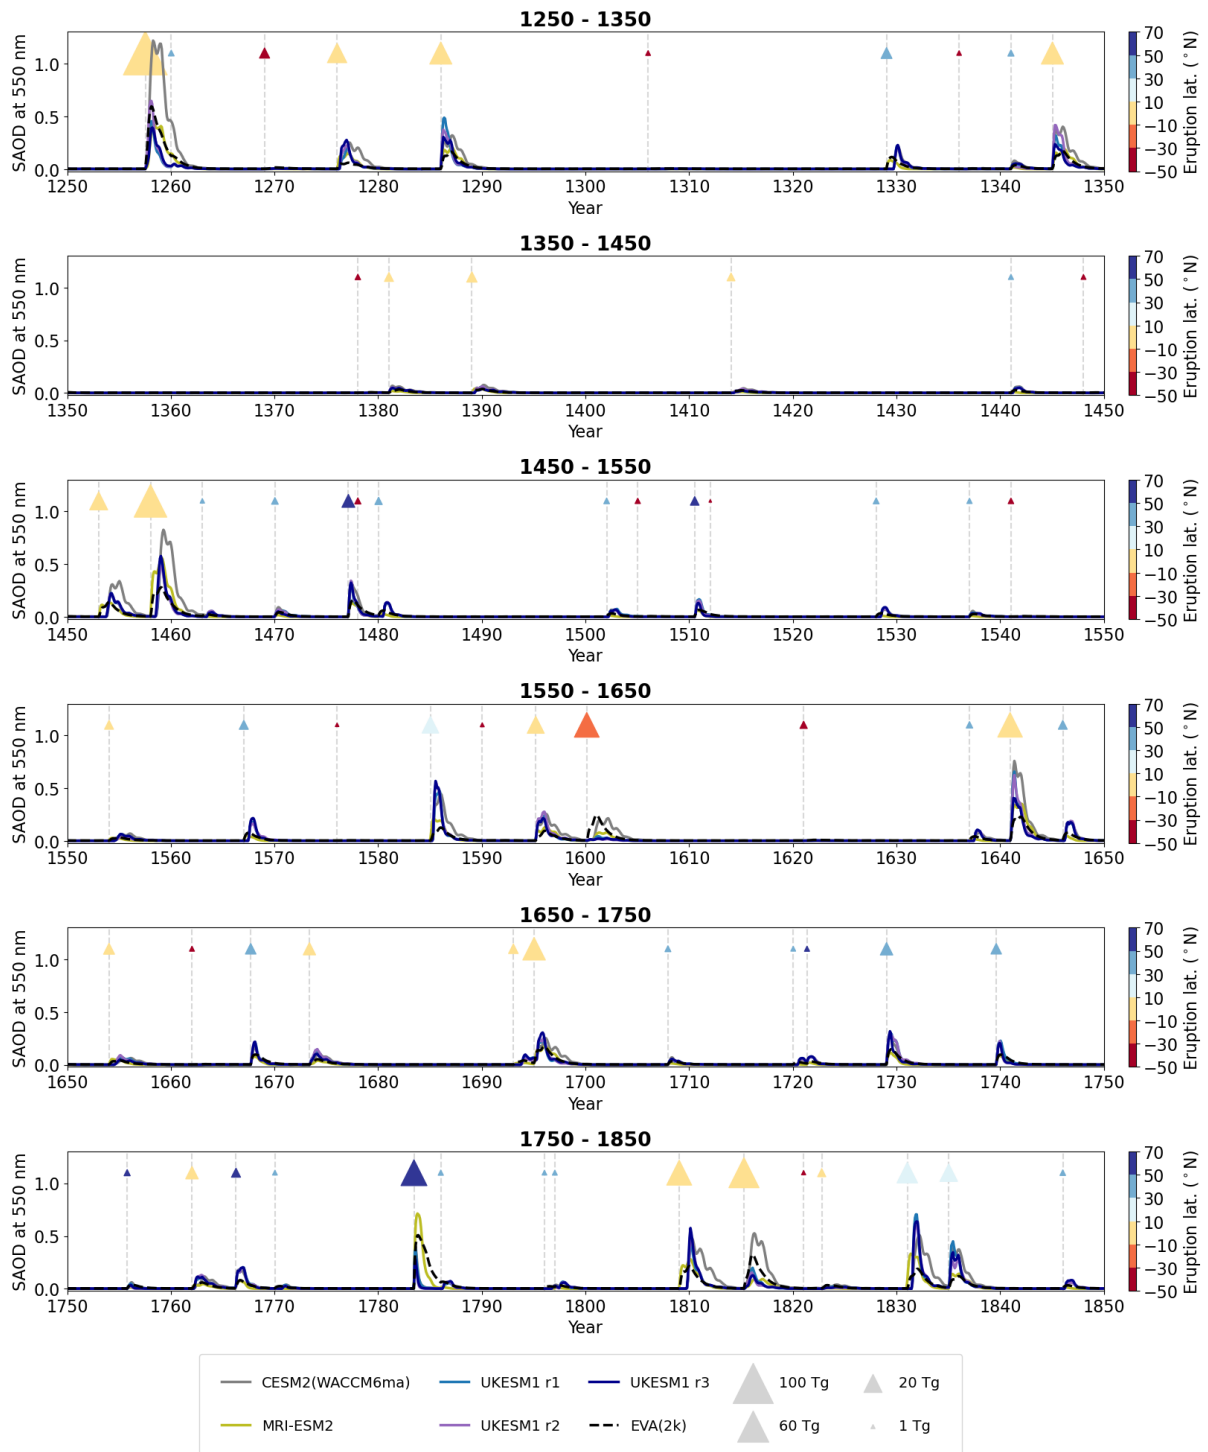

**Figure S5.** As Figure 1, but for the Northern Hemisphere SAOD averaged between 20°N and 90°N.

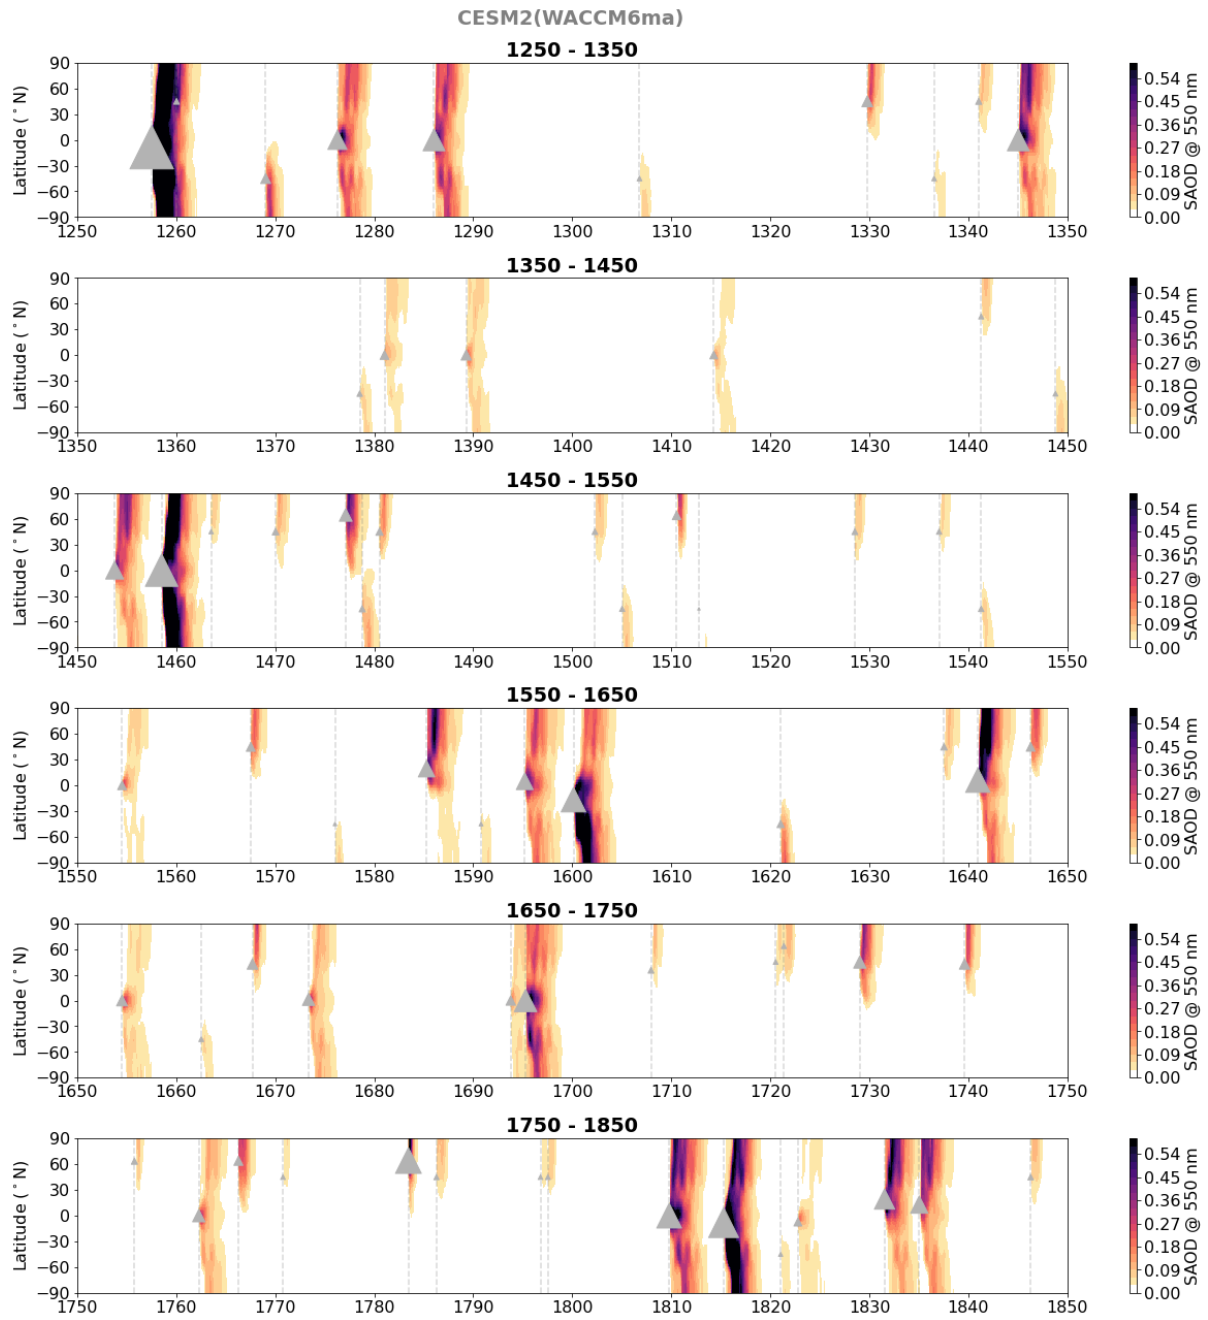

**Figure S6.** Zonal mean SAOD in CESM2(WACCM6ma) in 100-year chunks. Eruptions are marked by grey triangles and the size indicates the magnitude of the SO<sub>2</sub> emission, ranging from 0.4 Tg (for the 1512 Unidentified eruption) to 118 Tg (for the 1257 eruption of Samalas).

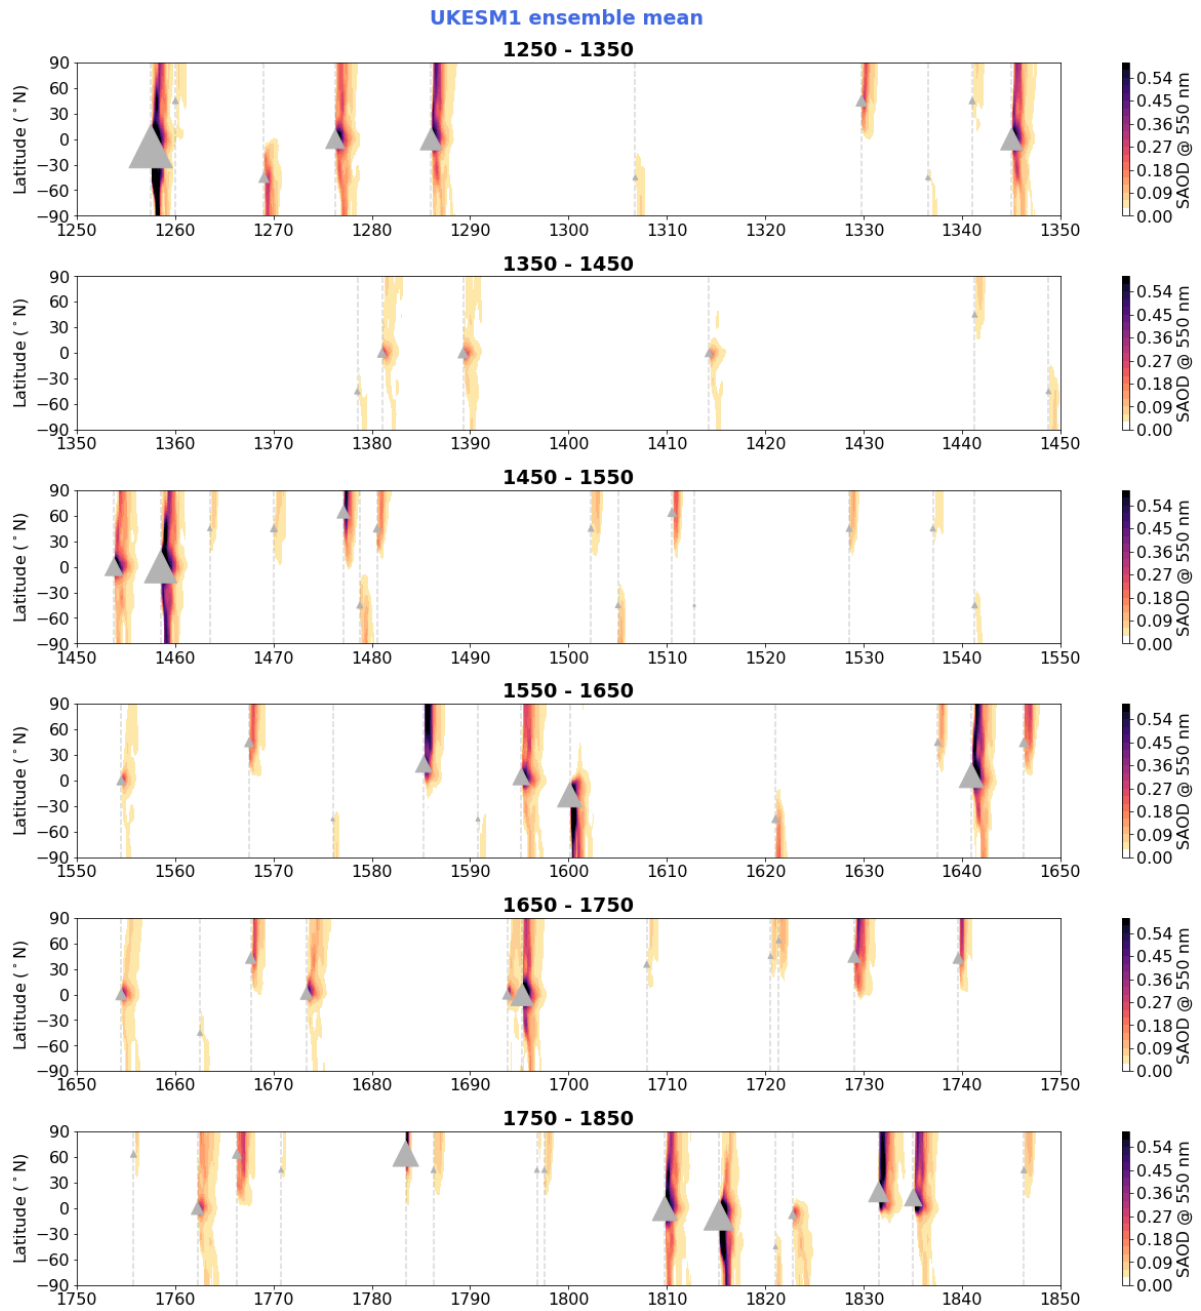

**Figure S7.** As Figure S6 but for the UKESM1 ensemble mean.

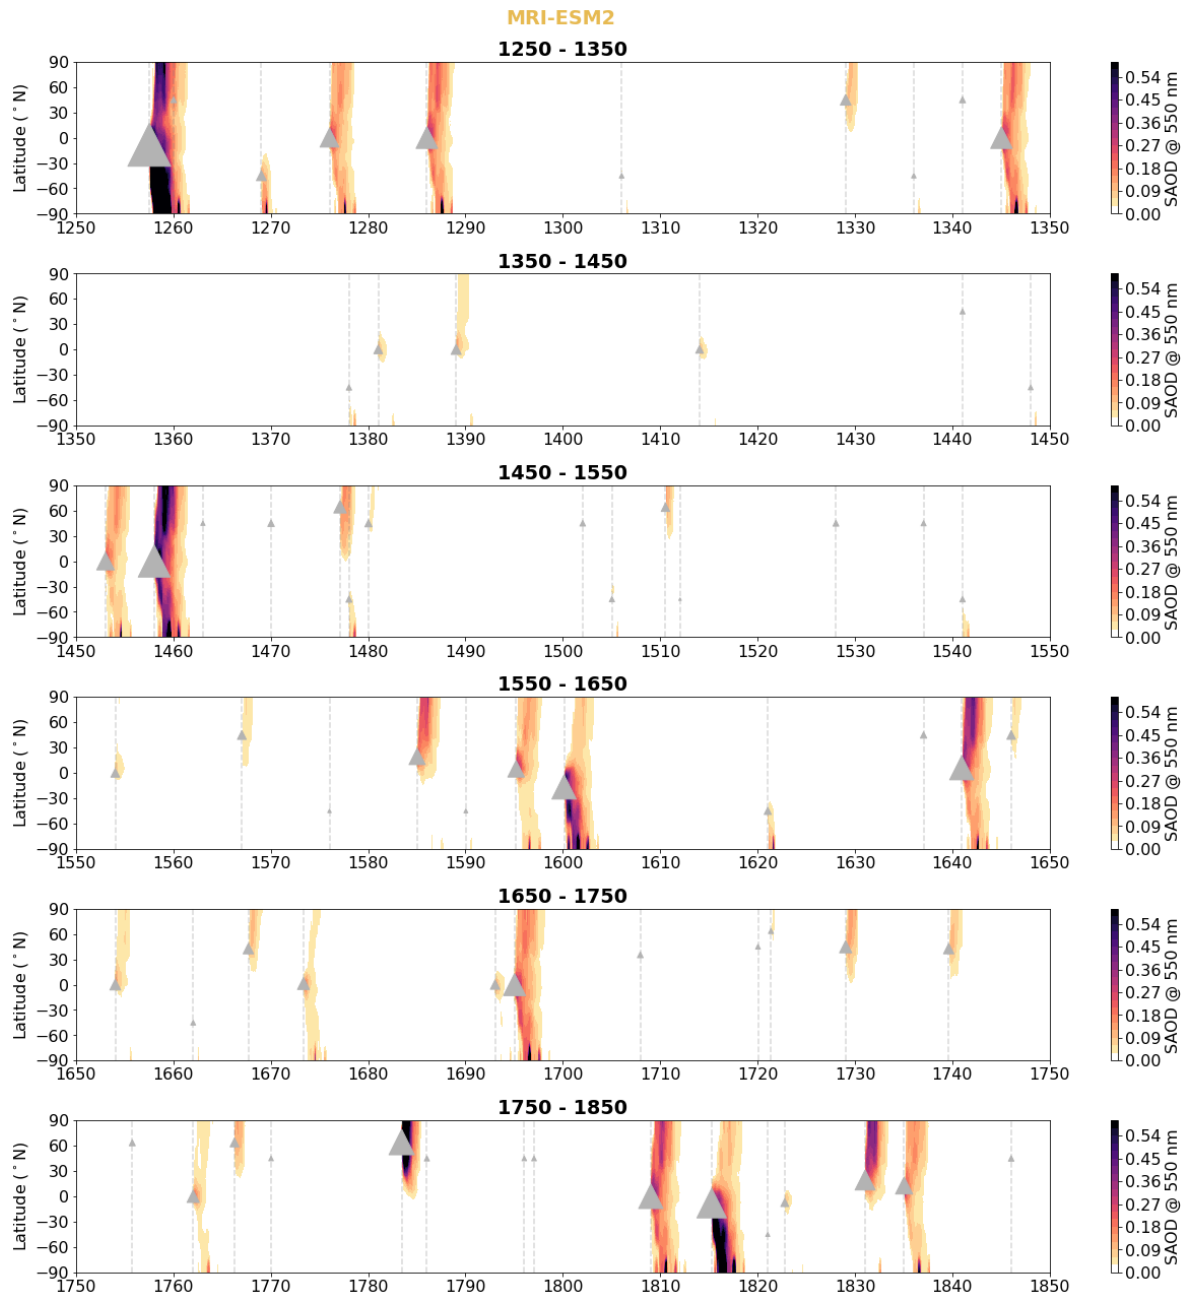

**Figure S8.** As Figure S6 but for MRI-ESM2.

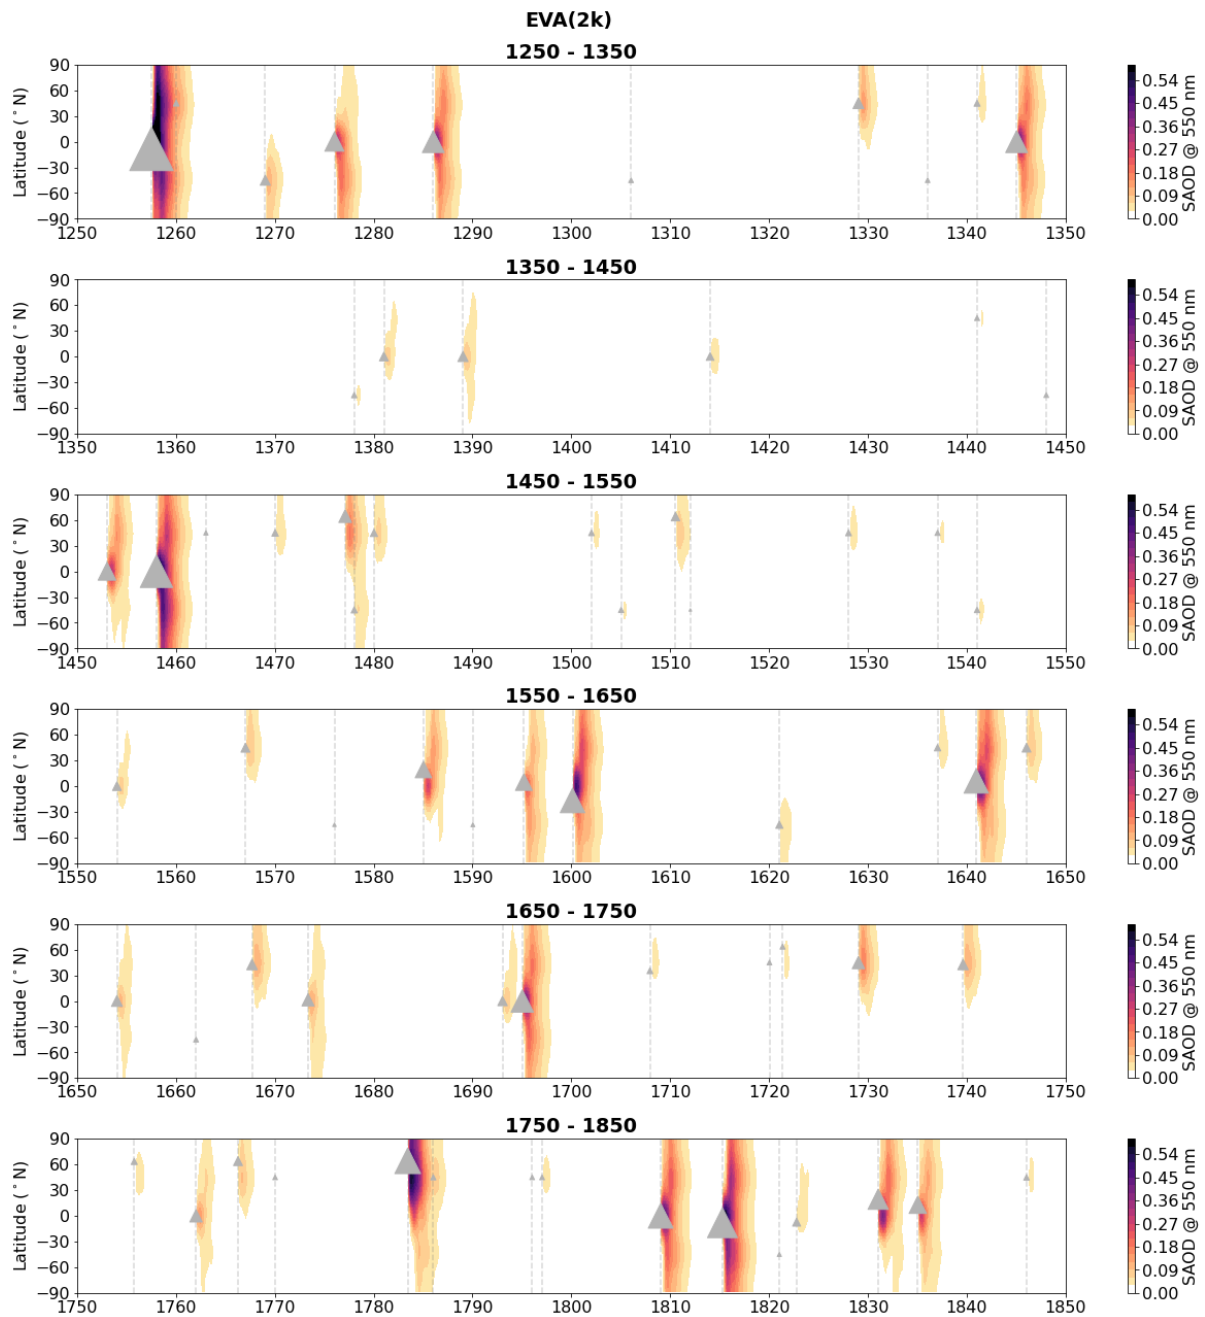

**Figure S9.** As Figure S6 but for EVA(2k).

**Table S3.** Volcanic events included in superposed epoch analysis with anomaly reference period

| <b>Event</b> | <b>Anomaly reference period</b> | <b>Double event</b> |
|--------------|---------------------------------|---------------------|
| 1257         | 5 years prior                   | N                   |
| 1276         | 5 years prior                   | N                   |
| 1286         | 5 years prior                   | N                   |
| 1345         | 1336-1340 (eruption in 1341)    | N                   |
| 1453         | 5 years prior                   | 1458 removed        |
| 1458         | 1448-1452 (eruption in 1453)    | 1463 removed        |
| 1477         | 1465-1469 (eruption in 1470)    | 1480 removed        |
| 1585         | 5 years prior                   | N                   |
| 1595         | 5 years prior                   | 1600 removed        |
| 1600         | 1590-1594 (eruption in 1595)    | N                   |
| 1640         | 1632-1636 (eruption in 1637)    | 1646 removed        |
| 1695         | 1688-1692 (eruption in 1693)    | N                   |
| 1783         | 5 years prior                   | 1786 removed        |
| 1809         | 5 years prior                   | 1815 removed        |
| 1815         | 1804-1808 (eruption in 1809)    | 1822 removed        |
| 1831         | 5 years prior                   | 1835 removed        |
| 1835         | 1826-1830 (eruption in 1831)    | N                   |

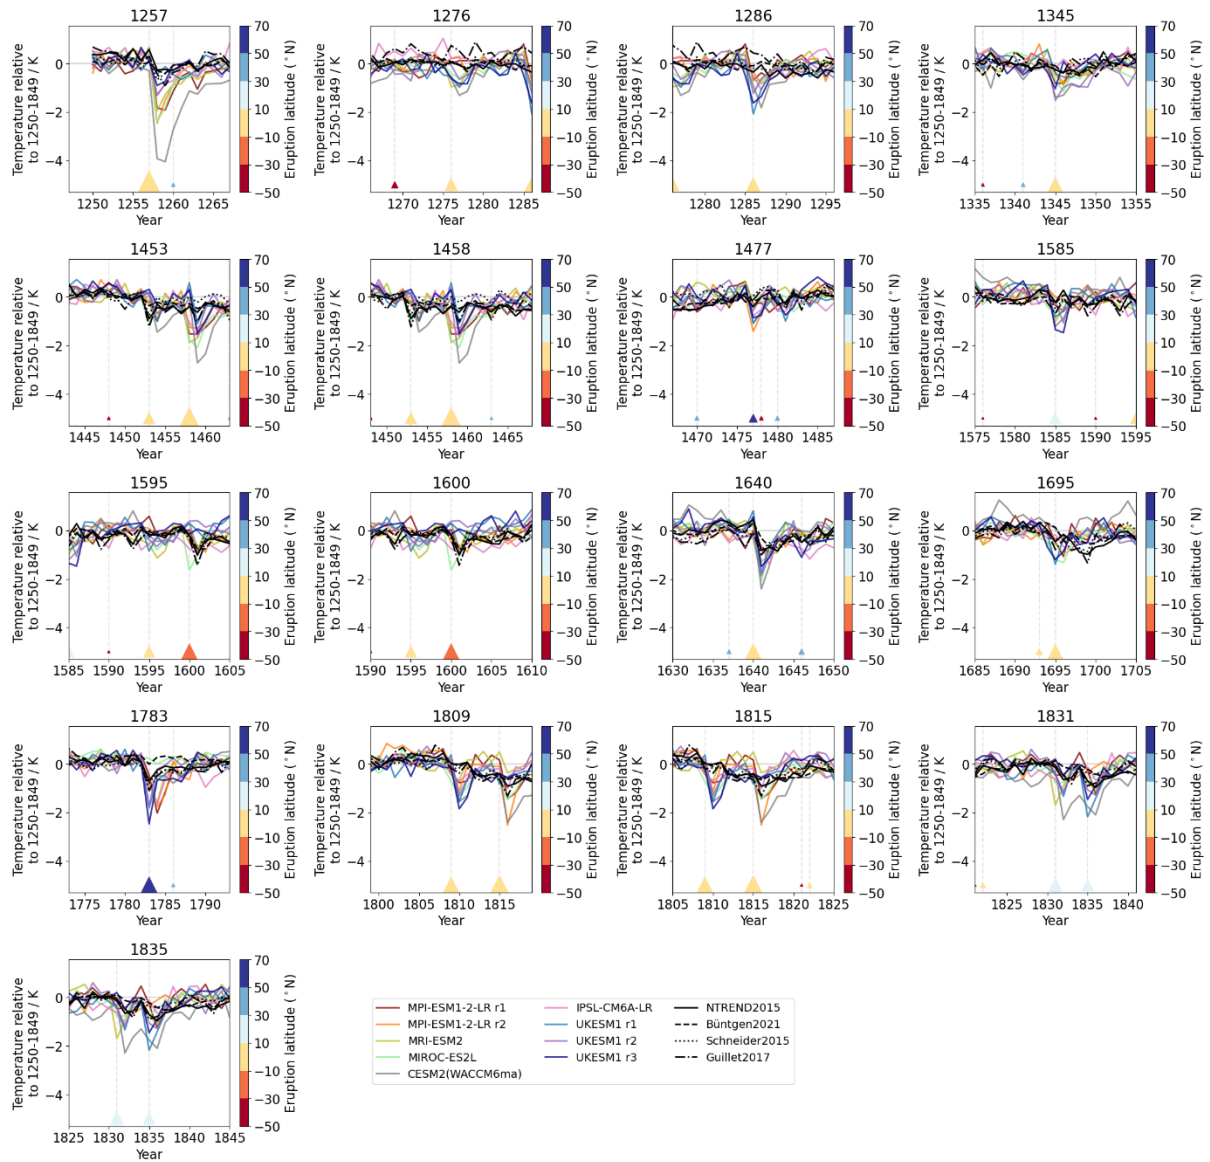

**Figure S10.** NH summer land surface air temperature anomalies (as in Figure 4) for the 17 large-magnitude eruptions (>10 Tg).

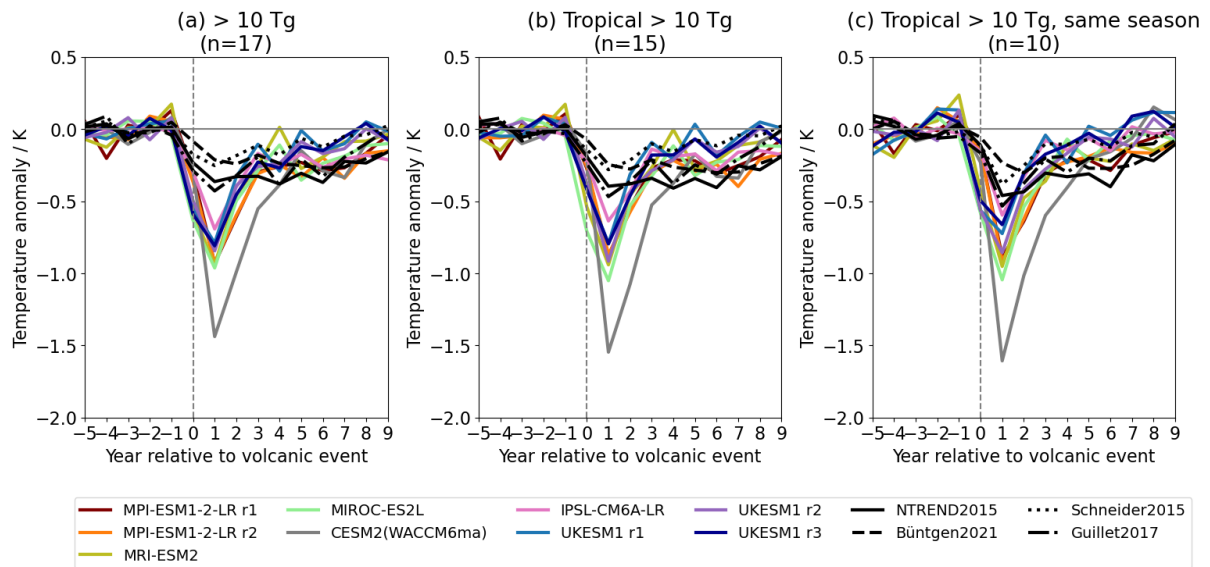

**Figure S11.** SEA as in Figure 3 but with all anomalies with reference to the 5-years prior to each eruption and double event data not removed.

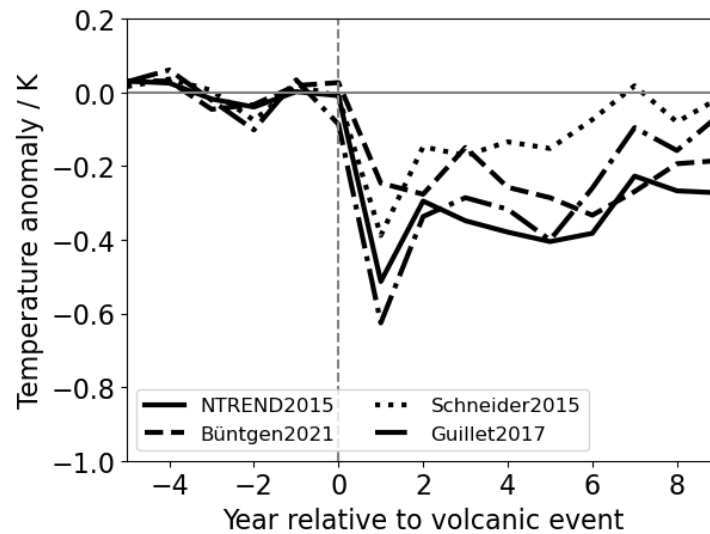

**Figure S12.** SEA for optimized dates in the four tree-ring reconstructions. Volcanic years used = 1257, 1277, 1287, 1344, 1458, 1584, 1600, 1640, 1694, 1808, 1815, 1831, 1835.



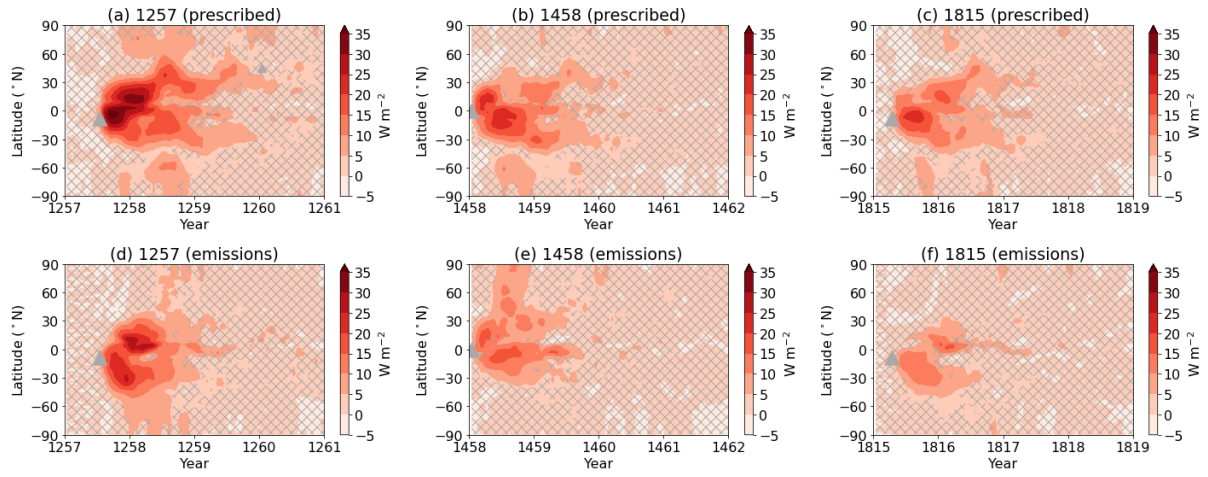

**Figure S13.** Zonal mean longwave anomalies.

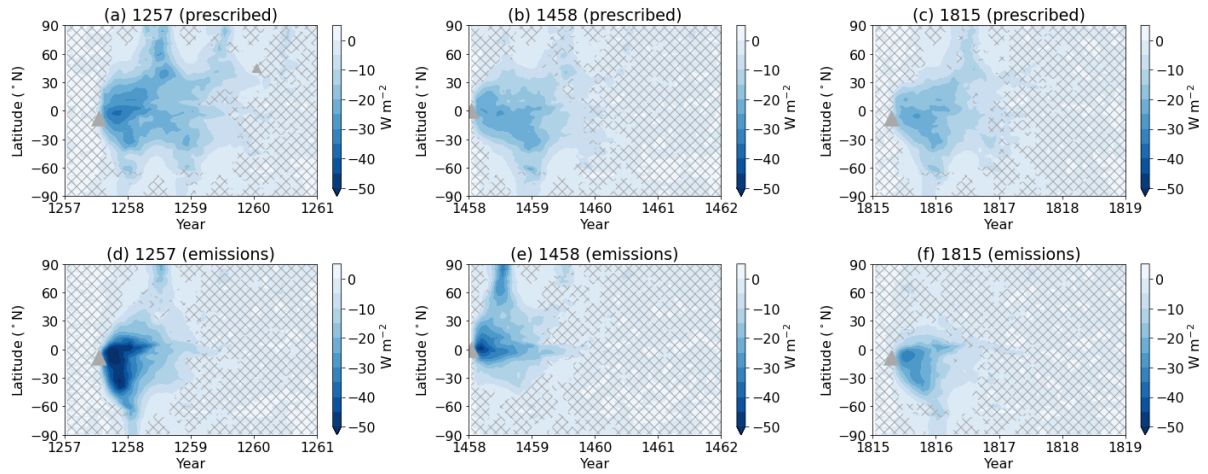

**Figure S14.** Zonal mean shortwave anomalies.

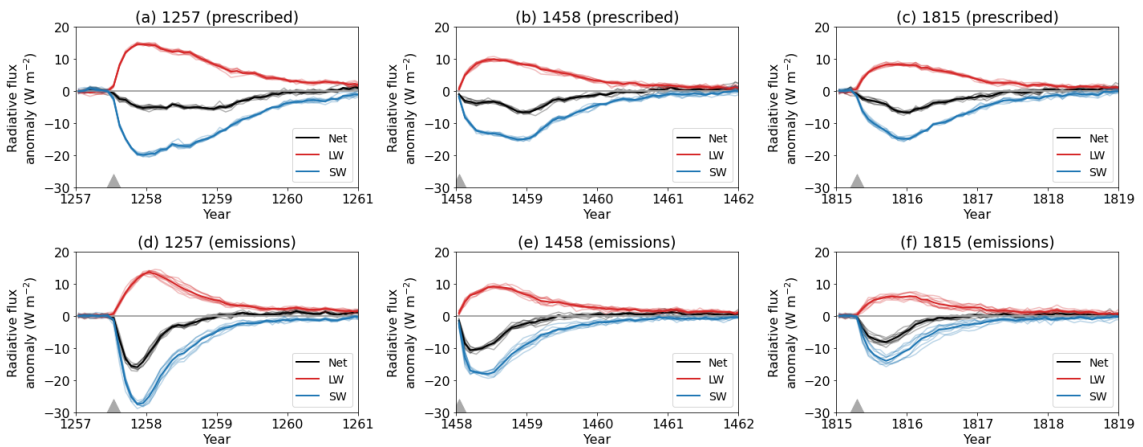

**Figure S15.** Global mean radiative flux anomalies. Longwave (LW) fluxes shown in red, shortwave (SW) in blue, and net in black. The ensemble mean values are shown in the thicker line.

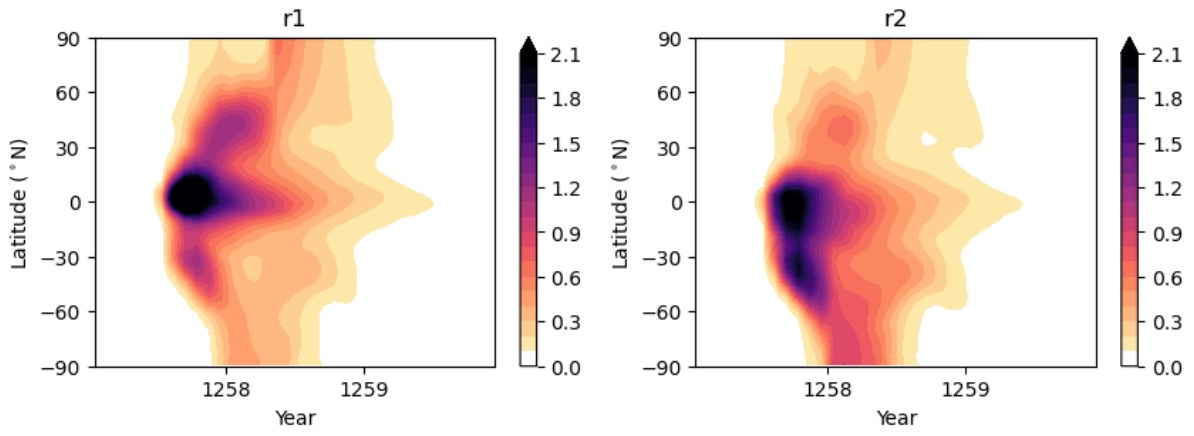

**Figure S16.** Zonal mean SAOD for 1257 Samalas simulated at 0°N for two ensemble members.

## References

- Dhomse, S. S., Mann, G. W., Antuña Marrero, J. C., Shallcross, S. E., Chipperfield, M. P., Carslaw, K. S., Marshall, L., Abraham, N. L., and Johnson, C. E.: Evaluating the simulated radiative forcings, aerosol properties, and stratospheric warmings from the 1963 Mt Agung, 1982 El Chichón, and 1991 Mt Pinatubo volcanic aerosol clouds, *Atmos. Chem. Phys.*, 20, 13627-13654, 10.5194/acp-20-13627-2020, 2020.
- Garrison, C. S., Kilburn, C. R. J., and Edwards, S. J.: The 1831 eruption of Babuyan Claro that never happened: has the source of one of the largest volcanic climate forcing events of the nineteenth century been misattributed?, *Journal of Applied Volcanology*, 7, 8, 10.1186/s13617-018-0078-9, 2018.
- Hoesly, R. M., Smith, S. J., Feng, L., Klimont, Z., Janssens-Maenhout, G., Pitkanen, T., Seibert, J. J., Vu, L., Andres, R. J., Bolt, R. M., Bond, T. C., Dawidowski, L., Kholod, N., Kurokawa, J. I., Li, M., Liu, L., Lu, Z., Moura, M. C. P., O'Rourke, P. R., and Zhang, Q.: Historical (1750–2014) anthropogenic emissions of reactive gases and aerosols from the Community Emissions Data System (CEDS), *Geosci. Model Dev.*, 11, 369-408, 10.5194/gmd-11-369-2018, 2018.
- Hurt, G. C., Chini, L., Sahajpal, R., Frohking, S., Bodirsky, B. L., Calvin, K., Doelman, J. C., Fisk, J., Fujimori, S., Klein Goldewijk, K., Hasegawa, T., Havlik, P., Heinemann, A., Humpenöder, F., Jungclaus, J., Kaplan, J. O., Kennedy, J., Krisztin, T., Lawrence, D., Lawrence, P., Ma, L., Mertz, O., Pongratz, J., Popp, A., Poulter, B., Riahi, K., Shevliakova, E., Stehfest, E., Thornton, P., Tubiello, F. N., van Vuuren, D. P., and Zhang, X.: Harmonization of global land use change and management for the period 850–2100 (LUH2) for CMIP6, *Geosci. Model Dev.*, 13, 5425-5464, 10.5194/gmd-13-5425-2020, 2020.
- Jungclaus, J. H., Bard, E., Baroni, M., Braconnot, P., Cao, J., Chini, L. P., Egorova, T., Evans, M., González-Rouco, J. F., Goosse, H., Hurt, G. C., Joos, F., Kaplan, J. O., Khodri, M., Klein Goldewijk, K., Krivova, N., LeGrande, A. N., Lorenz, S. J., Luterbacher, J., Man, W., Maycock, A. C., Meinshausen, M., Moberg, A., Muscheler, R., Nehrbass-Ahles, C., Otto-Bliesner, B. I., Phipps, S. J., Pongratz, J., Rozanov, E., Schmidt, G. A., Schmidt, H., Schmutz, W., Schurer, A., Shapiro, A. I., Sigl, M., Smerdon, J. E., Solanki, S. K., Timmreck, C., Toohey, M., Usoskin, I. G., Wagner, S., Wu, C. J., Yeo, K. L., Zanchettin, D., Zhang, Q., and Zorita, E.: The PMIP4 contribution to CMIP6 – Part 3: The last millennium, scientific objective, and experimental design for the PMIP4 past1000 simulations, *Geosci. Model Dev.*, 10, 4005-4033, 10.5194/gmd-10-4005-2017, 2017.
- Meinshausen, M., Vogel, E., Nauels, A., Lorbacher, K., Meinshausen, N., Etheridge, D. M., Fraser, P. J., Montzka, S. A., Rayner, P. J., Trudinger, C. M., Krummel, P. B., Beyerle, U., Canadell, J. G., Daniel, J. S., Enting, I. G., Law, R. M., Lunder, C. R., O'Doherty, S., Prinn, R. G., Reimann, S., Rubino, M., Velders, G. J. M., Vollmer, M. K., Wang, R. H. J., and Weiss, R.: Historical greenhouse gas concentrations for climate modelling (CMIP6), *Geosci. Model Dev.*, 10, 2057-2116, 10.5194/gmd-10-2057-2017, 2017.
- Schmidt, A., Carslaw, K. S., Mann, G. W., Wilson, M., Breider, T. J., Pickering, S. J., and Thordarson, T.: The impact of the 1783–1784 AD Laki eruption on global aerosol formation processes and cloud condensation nuclei, *Atmos. Chem. Phys.*, 10, 6025-6041, 10.5194/acp-10-6025-2010, 2010.
- Thomason, L. W., Ernest, N., Millán, L., Rieger, L., Bourassa, A., Vernier, J. P., Manney, G., Luo, B., Arfeuille, F., and Peter, T.: A global space-based stratospheric aerosol climatology: 1979–2016, *Earth Syst. Sci. Data*, 10, 469-492, 10.5194/essd-10-469-2018, 2018.
- Toohey, M. and Sigl, M.: Volcanic stratospheric sulfur injections and aerosol optical depth from 500 BCE to 1900 CE, *Earth Syst. Sci. Data*, 9, 809-831, 10.5194/essd-9-809-2017, 2017.
- Yukimoto, S., Kawai, H., Koshiro, T., Oshima, N., Yoshida, K., Urakawa, S., Tsujino, H., Deushi, M., Tanaka, T., Hosaka, M., Yabu, S., Yoshimura, H., Shindo, E., Mizuta, R., Obata, A., Adachi, Y., and Ishii, M.: The Meteorological Research Institute Earth System Model Version 2.0, MRI-ESM2.0: Description and Basic Evaluation of the Physical Component, *Journal of the Meteorological Society of Japan. Ser. II*, 97, 931-965, 10.2151/jmsj.2019-051, 2019.
